# Supplementary material for: Development and validation of a mitotic catastrophe-related genes prognostic model for breast cancer
Source: PeerJ. 2024 Sep 20;12:e18075. doi: 10.7717/peerj.18075 (PMC11418815; doi:10.7717/peerj.18075)
Supplement: Supplemental Information 4 [file peerj-12-18075-s004.xlsx]

## Sheet: Sheet1
ITEM TO CHECK	IMPORTANCE	CHECKLIST
EXPERIMENTAL DESIGN
Definition of experimental and control groups	E	Line 166-174
Number within each group	E	Line 166-174
Assay carried out by core lab or investigator's lab?	D	Investigator's lab
Acknowledgement of authors' contributions	D	Author information
SAMPLE
Description	E	Line 166-174
Volume/mass of sample processed	D	Cell:0.75 x 105-1 X 106cells, depending on the cell line；Tissue 20mg
Microdissection or macrodissection	E	N/A
Processing procedure	E	N/A
If frozen - how and how quickly?	E	Yes, RNA frozen at -80℃ immediately after isolation
If fixed - with what, how quickly?	E	N/A
Sample storage conditions and duration (especially for FFPE samples)	E	Frozen at -80℃ immediately after processing
NUCLEIC ACID EXTRACTION
Procedure and/or instrumentation	E	Line 176-177
Name of kit and details of any modifications	E	Line 176-177
Source of additional reagents used	D	N/A
Details of DNase or RNAse treatment	E	RNA resuspended in DEPC-treated water and reverse transcriptase reactions were treated with RNAse; no DNase treatment
Contamination assessment (DNA or RNA)	E	Done by OD 260/280 determination;also no reverse transcriptase control done for qPCR
Nucleic acid quantification	E	Nano-drop RNA extract
Instrument and method	E	Nano-drop RNA extract
Purity (A260/A280)	D	Approximately 2.0 for each sample
Yield	D	0.3-1.5 ug/ul
RNA integrity method/instrument	E	N/A
RIN/RQI or Cq of 3' and 5' transcripts	E	N/A
Electrophoresis traces	D	N/A
Inhibition testing (Cq dilutions, spike or other)	E	N/A
REVERSE TRANSCRIPTION
Complete reaction conditions	E	Line 177-178
Amount of RNA and reaction volume	E	Methods for RT-qPCR Analysis
Priming oligonucleotide (if using GSP) and concentration	E	Methods for RT-qPCR Analysis
Reverse transcriptase and concentration	E	Methods for RT-qPCR Analysis
Temperature and time	E	Methods for RT-qPCR Analysis
Manufacturer of reagents and catalogue numbers	D	Methods for RT-qPCR Analysis
Cqs with and without RT	D*	Methods for RT-qPCR Analysis
Storage conditions of cDNA	D	Stored at -80 in RNAse-free water
qPCR TARGET INFORMATION
If multiplex, efficiency and LOD of each assay.	E	N/A
Sequence accession number	E	N/A
Location of amplicon	D	N/A
Amplicon length	E	100~300bp
In silico specificity screen (BLAST, etc)	E	Yes, BLAST and UCSC Browser analysis performed
Pseudogenes, retropseudogenes or other homologs?	D	N/A
Sequence alignment	D	N/A
Secondary structure analysis of amplicon	D	N/A
Location of each primer by exon or intron (if applicable)	E	Methods for RT-qPCR Analysis
What splice variants are targeted?	E	N/A
qPCR OLIGONUCLEOTIDES
Primer sequences	E	Methods for RT-qPCR Analysis
RTPrimerDB Identification Number	D	N/A
Probe sequences	D**	N/A
Location and identity of any modifications	E	N/A
Manufacturer of oligonucleotides	D	Line 179-181
Purification method	D	PAGE,by manufacturer (TsingKe Biotech)
qPCR PROTOCOL
Complete reaction conditions	E	Methods for RT-qPCR Analysis
Reaction volume and amount of cDNA/DNA	E	Methods for RT-qPCR Analysis
Primer, (probe), Mg++ and dNTP concentrations	E	Methods for RT-qPCR Analysis
Polymerase identity and concentration	E	Methods for RT-qPCR Analysis
Buffer/kit identity and manufacturer	E	Line 178-179
Exact chemical constitution of the buffer	D	N/A
Additives (SYBR Green I, DMSO, etc.)	E	Methods for RT-qPCR Analysis
Manufacturer of plates/tubes and catalog number	D	Methods for RT-qPCR Analysis
Complete thermocycling parameters	E	Methods for RT-qPCR Analysis
Reaction setup (manual/robotic)	D	Methods for RT-qPCR Analysis
Manufacturer of qPCR instrument	E	Applied Biosystems
qPCR VALIDATION
Evidence of optimisation (from gradients)	D	N/A
Specificity (gel, sequence, melt, or digest)	E	N/A
For SYBR Green I, Cq of the NTC	E	N/A
Standard curves with slope and y-intercept	E	N/A
PCR efficiency calculated from slope	E	N/A
Confidence interval for PCR efficiency or standard error	D	Standard error
r2 of standard curve	E	N/A
Linear dynamic range	E	Yes
Cq variation at lower limit	E	N/A
Confidence intervals throughout range	D	N/A
Evidence for limit of detection	E	N/A
If multiplex, efficiency and LOD of each assay.	E	N/A
DATA ANALYSIS
qPCR analysis program (source, version)	E	Microsoft Excel version 12.3.4
Cq method determination	E	Determined and analyzed by sequence detection software (SDS 2.2, ABI)
Outlier identification and disposition	E	N/A
Results of NTCs	E	N/A
Justification of number and choice of reference genes	E	Line 179
Description of normalisation method	E	Line 181
Number and concordance of biological replicates	D	2
Number and stage (RT or qPCR) of technical replicates	E	3
Repeatability (intra-assay variation)	E	< 1.5%
Reproducibility (inter-assay variation, %CV)	D	N/A
Power analysis	D	N/A
Statistical methods for result significance	E	Paired T test;ANOVA
Software (source, version)	E	Graphpad Pism version 9.5
Cq or raw data submission using RDML	D	N/A
Table 1. MIQE checklist for authors, reviewers and editors. All essential information (E) must be submitted with the manuscript. Desirable
information (D) should be submitted if available. If using primers obtained from RTPrimerDB, information on qPCR target, oligonucleotides,
protocols and validation is available from that source.
*: Assessing the absence of DNA using a no RT assay is essential when first extracting RNA. Once the sample has been validated as
RDNA-free, inclusion of a no-RT control is desirable, but no longer essential.
**: Disclosure of the probe sequence is highly desirable and strongly encouraged. However, since not all commercial pre-designed assay
vendors provide this information, it cannot be an essential requirement. Use of such assays is advised against.
